# Supplementary material
Source: publisher figshare collection journal article supplement (https://acs.figshare.com/ndownloader/files/4796791)
Supplement: Supplementary file 1 [file 4796791]

## Sheet: TITLE
SUPPORTING INFORMATION FOR
α-Hydrogen Abstraction by •OH and •SH Radicals From Amino Acids and Their Peptide Derivatives
Bun Chan,*,†,§ Amir Karton,¶ Christopher J. Easton‡,§ and Leo Radom*,†,§
† School of Chemistry, University of Sydney, Sydney, NSW 2006, Australia
§ ARC Centre of Excellence for Free Radical Chemistry and Biotechnology
¶ School of Chemistry and Biochemistry, University of Western Australia, Perth, WA 6009, Australia
‡ Research School of Chemistry, Australian National University, Canberra, ACT 2600, Australia

## Sheet: Amino acid
	ZPVE	ΔH(298)	S(298)	W1X-2	G4	G4(MP2)-6X	G4(MP2)	G3X(MP2)-RAD	CBS-QB3	B2K-PLYP	PWP-B95-D3	DuT-D3	DSD-PBE-P86	PW6-B95	ωB97-X	M06-2X	M06-L	MN12-L
Ala	279.757	20.9253	342.774	-323.865	-323.692	-323.467	-323.448	-323.401	-323.368	-323.542	-323.691	-323.6	-323.338	-324.253	-323.792	-323.737	-323.824	-323.544
Asn	352.059	28.4036	410.452	-492.636	-492.365	-492.024	-491.997	-491.926	-491.882	-492.15	-492.377	-492.235	-491.841	-493.221	-492.523	-492.446	-492.573	-492.17
Asp	320.505	27.8407	413.394	-512.524	-512.227	-511.884	-511.856	-511.782	-511.741	-512.018	-512.248	-512.103	-511.699	-513.113	-512.393	-512.318	-512.444	-512.041
Cys	280.322	24.6993	380.554	-722.905	-721.761	-721.236	-721.215	-721.157	-721.116	-721.552	-721.857	-721.621	-721.243	-722.778	-721.992	-721.924	-722.02	-721.709
Gly	207.036	17.4525	314.053	-284.544	-284.382	-284.193	-284.177	-284.135	-284.11	-284.263	-284.389	-284.311	-284.085	-284.874	-284.474	-284.428	-284.502	-284.266
Pro	375.034	22.593	370.091	-401.282	-401.083	-400.784	-400.761	-400.704	-400.658	-400.881	-401.077	-400.953	-400.624	-401.787	-401.205	-401.136	-401.243	-400.896
Ser	295.649	22.5131	357.836	-399.123	-398.894	-398.63	-398.607	-398.549	-398.514	-398.726	-398.904	-398.794	-398.478	-399.581	-399.021	-398.96	-399.057	-398.732
Thr	367.346	26.2105	384.99	-438.446	-438.207	-437.906	-437.881	-437.817	-437.775	-438.008	-438.208	-438.085	-437.733	-438.962	-438.342	-438.271	-438.383	-438.013
Val	425.856	27.7896	395.987	-402.501	-402.306	-402.009	-401.985	-401.928	-401.877	-402.096	-402.289	-402.171	-401.838	-403.004	-402.425	-402.349	-402.465	-402.096
OH	22.0629	8.67636	178.01	-75.7711	-75.7181	-75.6804	-75.6758	-75.6635	-75.6581	-75.6974	-75.7241	-75.7075	-75.6521	-75.8431	-75.742	-75.7296	-75.751	-75.6924
H2O	55.3382	9.92576	188.363	-76.471	-76.4182	-76.3814	-76.3767	-76.364	-76.3585	-76.3927	-76.4198	-76.4052	-76.3474	-76.5415	-76.4394	-76.4256	-76.446	-76.3801
Units:
ZPVE	kJ/mol
ΔH(298)	kJ/mol
S(298)	J/(mol*K)
Vibrationless energy	hartree

## Sheet: Amino acid radical
	ZPVE	ΔH(298)	S(298)	W1X-2	G4	G4(MP2)-6X	G4(MP2)	G3X(MP2)-RAD	CBS-QB3	B2K-PLYP	PWP-B95-D3	DuT-D3	DSD-PBE-P86	PW6-B95	ωB97-X	M06-2X	M06-L	MN12-L
Ala	296.726	26.7501	396.236	-323.229	-323.056	-322.829	-322.813	-322.762	-322.732	-322.912	-323.062	-322.967	-322.706	-323.625	-323.162	-323.108	-323.199	-322.925
Asn	370.643	33.9422	464.292	-492.002	-491.733	-491.389	-491.366	-491.289	-491.248	-491.522	-491.75	-491.605	-491.211	-492.596	-491.894	-491.818	-491.948	-491.551
Asp	336.089	33.7158	464.185	-511.892	-511.596	-511.251	-511.226	-511.146	-511.109	-511.391	-511.622	-511.475	-511.071	-512.489	-511.766	-511.692	-511.822	-511.424
Cys	296.698	30.7429	438.459	-722.269	-721.127	-720.599	-720.581	-720.518	-720.481	-720.922	-721.228	-720.99	-720.611	-722.152	-721.362	-721.296	-721.395	-721.091
Gly	223.681	23.1608	369.889	-283.905	-283.743	-283.552	-283.538	-283.493	-283.471	-283.629	-283.756	-283.675	-283.449	-284.242	-283.839	-283.795	-283.87	-283.641
Pro	392.06	28.8709	423.764	-400.65	-400.453	-400.151	-400.131	-400.069	-400.027	-400.254	-400.452	-400.325	-399.996	-401.164	-400.579	-400.51	-400.621	-400.28
Ser	310.827	29.102	418.51	-398.485	-398.257	-397.99	-397.97	-397.908	-397.877	-398.093	-398.272	-398.159	-397.844	-398.951	-398.388	-398.328	-398.428	-398.108
Thr	382.542	32.7669	444.208	-437.808	-437.571	-437.267	-437.245	-437.177	-437.137	-437.375	-437.577	-437.451	-437.1	-438.332	-437.71	-437.639	-437.754	-437.39
Val	442.931	33.8803	455.325	-401.863	-401.67	-401.37	-401.35	-401.287	-401.241	-401.464	-401.659	-401.537	-401.205	-402.376	-401.793	-401.719	-401.837	-401.475
Units:
ZPVE	kJ/mol
ΔH(298)	kJ/mol
S(298)	J/(mol*K)
Vibrationless energy	hartree

## Sheet: Amino acid TS(OH)
	ZPVE	ΔH(298)	S(298)	W1X-2	G4	G4(MP2)-6X	G4(MP2)	G3X(MP2)-RAD	CBS-QB3	B2K-PLYP	PWP-B95-D3	DuT-D3	DSD-PBE-P86	PW6-B95	ωB97-X	M06-2X	M06-L	MN12-L
Ala	296.726	26.7501	396.236	-399.637	-399.412	-399.147	-399.127	-399.063	-399.029	-399.239	-399.42	-399.306	-398.99	-400.105	-399.54	-399.47	-399.589	-399.24
Asn	370.643	33.9422	464.292	-568.409	-568.088	-567.706	-567.679	-567.589	-567.543	-567.846	-568.107	-567.941	-567.494	-569.074	-568.27	-568.179	-568.339	-567.867
Asp	336.089	33.7158	464.185	-588.293	-587.945	-587.562	-587.533	-587.44	-587.398	-587.71	-587.972	-587.805	-587.348	-588.959	-588.135	-588.046	-588.203	-587.732
Cys	296.698	30.7429	438.459	-798.674	-797.478	-796.912	-796.891	-796.815	-796.773	-797.244	-797.582	-797.323	-796.891	-798.627	-797.735	-797.654	-797.782	-797.403
Gly	223.681	23.1608	369.889	-360.314	-360.099	-359.871	-359.852	-359.795	-359.768	-359.957	-360.117	-360.016	-359.735	-360.725	-360.219	-360.159	-360.265	-359.96
Pro	392.06	28.8709	423.764	-477.055	-476.806	-476.465	-476.442	-476.367	-476.32	-476.577	-476.807	-476.66	-476.277	-477.641	-476.953	-476.869	-477.011	-476.593
Ser	310.827	29.102	418.51	-474.895	-474.615	-474.31	-474.286	-474.21	-474.175	-474.421	-474.632	-474.5	-474.13	-475.432	-474.767	-474.692	-474.822	-474.426
Thr	382.542	32.7669	444.208	-514.218	-513.928	-513.586	-513.561	-513.479	-513.435	-513.703	-513.937	-513.79	-513.385	-514.813	-514.088	-514.003	-514.148	-513.708
Val	442.931	33.8803	455.325	-478.271	-478.026	-477.687	-477.664	-477.588	-477.536	-477.789	-478.016	-477.874	-477.489	-478.854	-478.17	-478.08	-478.228	-477.79
Units:
ZPVE	kJ/mol
ΔH(298)	kJ/mol
S(298)	J/(mol*K)
Vibrationless energy	hartree

## Sheet: Peptide
	ZPVE	ΔH(298)	S(298)	DSD-PBE-P86	M06-2X	MN12-L	M05-2X (gas-phase)	M05-2X (water)	M05-2X (benzene)
Ala	480.255	35.5071	473.987	-495.185	-495.823	-495.518	-495.777	-495.799	-495.79
Arg	779.618	52.4821	605.198	-777.595	-778.607	-778.122	-778.541	-778.571	-778.559
Asn	557.236	40.9644	512.634	-663.699	-664.541	-664.153	-664.474	-664.496	-664.486
Asp	522.679	41.511	525.166	-683.555	-684.411	-684.022	-684.333	-684.359	-684.348
Cys	482.061	38.5661	499.071	-893.095	-894.015	-893.689	-893.941	-893.96	-893.954
Gln	628.179	45.6486	554.336	-702.948	-703.846	-703.428	-703.778	-703.804	-703.793
Glu	598.127	44.7113	550.806	-722.806	-723.718	-723.298	-723.641	-723.668	-723.657
Gly	407.41	32.1054	454.888	-455.931	-456.513	-456.24	-456.465	-456.489	-456.478
His	621.036	43.0394	531.46	-719.909	-720.854	-720.432	-720.799	-720.824	-720.818
Ile	700.883	45.7004	547.342	-612.937	-613.742	-613.346	-613.7	-613.717	-613.714
Leu	700.995	45.4964	548.776	-612.939	-613.743	-613.347	-613.701	-613.719	-613.715
Lys	748.665	48.8923	580.677	-668.216	-669.089	-668.657	-669.034	-669.061	-669.05
Met	632.867	45.8551	554.762	-971.598	-972.63	-972.244	-972.561	-972.579	-972.575
Phe	692.198	46.7467	572.495	-725.88	-726.853	-726.432	-726.814	-726.835	-726.832
Pro	576.833	36.2948	471.431	-572.483	-573.232	-572.881	-573.194	-573.212	-573.208
Ser	498.494	36.144	474.926	-570.334	-571.054	-570.714	-570.991	-571.012	-571.003
Thr	565.872	42.1968	527.503	-609.58	-610.354	-609.984	-610.29	-610.318	-610.305
Trp	768.285	52.238	610.743	-857.27	-858.424	-857.941	-858.38	-858.408	-858.402
Tyr	702.754	50.2122	602.836	-801.028	-802.083	-801.629	-802.024	-802.053	-802.043
Val	627.338	42.0966	518.875	-573.689	-574.437	-574.072	-574.395	-574.413	-574.408
OH	22.0629	8.67636	178.01	-75.6521	-75.7296	-75.6924	-75.7088	-75.7182	-75.7123
H2O	55.3382	9.92576	188.363	-76.3474	-76.4256	-76.3801	-76.3937	-76.4076	-76.3979
SH	15.8206	8.67646	191.951	-398.452	-398.734	-398.706	-398.705	-398.708	-398.71
H2S	39.1974	9.95979	205.434	-399.101	-399.383	-399.351	-399.349	-399.352	-399.353
Units:
ZPVE	kJ/mol
ΔH(298)	kJ/mol
S(298)	J/(mol*K)
Vibrationless energy	hartree

## Sheet: Peptide radical
	ZPVE	ΔH(298)	S(298)	DSD-PBE-P86	M06-2X	MN12-L	M05-2X (gas-phase)	M05-2X (water)	M05-2X (benzene)
Ala	447.056	35.5295	478.055	-494.541	-495.18	-494.888	-495.136	-495.155	-495.148
Arg	746.71	52.5971	612.989	-776.954	-777.968	-777.495	-777.88	-777.907	-777.898
Asn	522.827	41.3605	524.642	-663.047	-663.89	-663.513	-663.822	-663.845	-663.836
Asp	490.282	41.0953	528.767	-682.906	-683.763	-683.386	-683.687	-683.711	-683.701
Cys	449.089	38.2751	500.228	-892.451	-893.373	-893.058	-893.3	-893.318	-893.314
Gln	595.741	45.1746	553.262	-702.303	-703.204	-702.796	-703.136	-703.162	-703.152
Glu	565.361	44.1516	556.352	-722.151	-723.064	-722.655	-722.989	-723.012	-723.004
Gly	374.374	31.4918	454.093	-455.288	-455.872	-455.608	-455.825	-455.846	-455.838
His	586.487	43.3158	545.086	-719.253	-720.199	-719.788	-720.144	-720.171	-720.165
Ile	667.384	45.4707	553.787	-612.284	-613.089	-612.704	-613.048	-613.067	-613.063
Leu	667.521	45.0114	550.802	-612.286	-613.091	-612.707	-613.051	-613.07	-613.065
Lys	715.005	48.5605	591.009	-667.562	-668.436	-668.014	-668.381	-668.409	-668.399
Met	599.64	45.4663	559.653	-970.943	-971.976	-971.6	-971.908	-971.924	-971.922
Phe	659.24	46.3372	574.457	-725.233	-726.208	-725.798	-726.171	-726.19	-726.188
Pro	542.758	36.0548	473.412	-571.828	-572.577	-572.238	-572.54	-572.56	-572.555
Ser	464.043	36.5369	486.244	-569.675	-570.395	-570.066	-570.331	-570.355	-570.345
Thr	534.499	40.816	514.327	-608.931	-609.707	-609.347	-609.645	-609.667	-609.658
Trp	735.377	51.7985	611.833	-856.622	-857.776	-857.304	-857.734	-857.761	-857.756
Tyr	670.217	49.578	594.135	-800.381	-801.438	-800.996	-801.381	-801.407	-801.4
Val	593.765	41.8834	526.514	-573.034	-573.783	-573.429	-573.742	-573.761	-573.756
Units:
ZPVE	kJ/mol
ΔH(298)	kJ/mol
S(298)	J/(mol*K)
Vibrationless energy	hartree

## Sheet: Peptide TS(OH)
Values obtained with BHandH-LYP-optimized geometries								Values obtained with IRCmax structures
	ZPVE	ΔH(298)	S(298)	DSD-PBE-P86	M06-2X	MN12-L			ZPVE	ΔH(298)	S(298)	DSD-PBE-P86	M05-2X (gas-phase)	M05-2X (water)	M05-2X (benzene)
Ala	497.736	40.0778	509.468	-570.846	-571.563	-571.221		Ala	504.973	40.0541	527.64	-570.843	-571.494	-571.515	-571.506
Arg	797.539	57.0734	640.145	-853.254	-854.346	-853.825		Arg	803.574	56.9854	649.615	-853.252	-854.248	-854.287	-854.273
Asn	573.317	46.1915	554.855	-739.356	-740.278	-739.853		Asn	581.253	45.8301	556.665	-739.354	-740.186	-740.212	-740.199
Asp	540.826	45.9507	563.285	-759.212	-760.147	-759.721		Asp	547.052	45.4723	558.498	-759.209	-760.046	-760.074	-760.061
Cys	500.319	42.6328	529.016	-968.755	-969.755	-969.392		Cys	508.191	42.2884	529.958	-968.753	-969.658	-969.678	-969.671
Gln	646.62	49.6569	579.562	-778.607	-779.586	-779.132		Gln	652.706	49.4691	583.482	-778.605	-779.494	-779.524	-779.51
Glu	615.732	48.8599	575.788	-798.464	-799.456	-798.999		Glu	621.702	48.5684	580.042	-798.462	-799.356	-799.384	-799.372
Gly	425.827	36.2658	485.472	-531.59	-532.252	-531.941		Gly	433.161	36.1298	487.508	-531.588	-532.181	-532.205	-532.193
His	636.911	48.3092	575.036	-795.565	-796.589	-796.131		His	643.071	48.0491	578.835	-795.563	-796.51	-796.54	-796.53
Ile	717.887	50.799	592.782	-688.596	-689.48	-689.047		Ile	723.634	50.5287	595.476	-688.594	-689.415	-689.436	-689.43
Leu	717.914	50.2293	588.596	-688.593	-689.477	-689.044		Leu	723.955	49.9338	589.677	-688.591	-689.411	-689.434	-689.426
Lys	764.669	54.1533	625.257	-743.871	-744.824	-744.354		Lys	772.564	53.8603	629.104	-743.869	-744.745	-744.776	-744.762
Met	649.016	50.831	595.891	-1047.25	-1048.36	-1047.94		Met	655.119	50.4649	596.397	-1047.25	-1048.27	-1048.29	-1048.29
Phe	709.588	51.3156	604.839	-801.539	-802.592	-802.132		Phe	715.631	51.1853	614.63	-801.536	-802.53	-802.551	-802.548
Pro	593.19	41.3929	513.197	-648.139	-648.967	-648.579		Pro	600.927	41.047	515.6	-648.137	-648.905	-648.928	-648.92
Ser	514.398	41.479	517.014	-645.989	-646.788	-646.411		Ser	520.487	41.1946	520.066	-645.986	-646.7	-646.726	-646.713
Thr	586.147	45.1531	540.645	-685.245	-686.1	-685.693		Thr	592.024	44.9742	546.714	-685.243	-686.014	-686.038	-686.028
Trp	785.491	56.9537	646.204	-932.927	-934.16	-933.638		Trp	791.716	56.6961	651.295	-932.924	-934.093	-934.122	-934.115
Tyr	720.412	54.6941	631.265	-876.687	-877.822	-877.329		Tyr	726.379	54.6123	642.63	-876.684	-877.74	-877.769	-877.759
Val	644.394	47.0966	561.323	-649.347	-650.176	-649.773		Val	650.254	46.7968	563.113	-649.345	-650.11	-650.131	-650.124
Units:
ZPVE	kJ/mol
ΔH(298)	kJ/mol
S(298)	J/(mol*K)
Vibrationless energy	hartree

## Sheet: Peptide TS(SH)
	ZPVE	ΔH(298)	S(298)	DSD-PBE-P86	M06-2X	MN12-L	M05-2X (gas-phase)	M05-2X (water)	M05-2X (benzene)
Ala	485.454	42.1621	533.563	-893.631	-894.551	-894.223	-894.476	-894.497	-894.491
Arg	784.782	59.3557	663.835	-1176.04	-1177.34	-1176.83	-1177.23	-1177.27	-1177.26
Asn	560.83	48.2285	575.747	-1062.14	-1063.27	-1062.85	-1063.17	-1063.19	-1063.18
Asp	528.382	47.907	582.019	-1082	-1083.13	-1082.72	-1083.03	-1083.05	-1083.04
Cys	487.3	44.7659	550.689	-1291.54	-1292.74	-1292.39	-1292.64	-1292.66	-1292.65
Gln	633.87	51.9312	604.913	-1101.39	-1102.58	-1102.14	-1102.48	-1102.5	-1102.49
Glu	603.503	50.6465	593.194	-1121.25	-1122.44	-1122	-1122.33	-1122.36	-1122.35
Gly	413.19	38.4217	512.237	-854.376	-855.241	-854.943	-855.164	-855.187	-855.179
His	624.471	50.3329	597.21	-1118.35	-1119.58	-1119.13	-1119.49	-1119.52	-1119.51
Ile	704.372	52.8289	607.507	-1011.38	-1012.46	-1012.05	-1012.39	-1012.41	-1012.41
Leu	705.846	51.8944	601.612	-1011.38	-1012.46	-1012.04	-1012.39	-1012.41	-1012.41
Lys	752.687	55.8976	646.223	-1066.66	-1067.81	-1067.35	-1067.72	-1067.75	-1067.74
Met	637.138	52.4818	610.151	-1370.04	-1371.35	-1370.94	-1371.25	-1371.27	-1371.27
Phe	696.929	53.4107	626.126	-1124.32	-1125.58	-1125.13	-1125.51	-1125.53	-1125.53
Pro	580.798	43.2803	533.338	-970.924	-971.954	-971.579	-971.886	-971.906	-971.903
Ser	501.511	43.7395	544.326	-968.771	-969.773	-969.408	-969.678	-969.702	-969.694
Thr	573.447	47.2399	562.35	-1008.03	-1009.08	-1008.69	-1008.99	-1009.01	-1009.01
Trp	772.865	58.931	664.415	-1255.71	-1257.15	-1256.64	-1257.07	-1257.1	-1257.1
Tyr	707.832	56.6952	649.688	-1199.47	-1200.81	-1200.33	-1200.72	-1200.75	-1200.74
Val	631.18	49.0414	575.334	-972.129	-973.159	-972.771	-973.085	-973.107	-973.102
Units:
ZPVE	kJ/mol
ΔH(298)	kJ/mol
S(298)	J/(mol*K)
Vibrationless energy	hartree

## Sheet: Amino acid BDE
	W1X-2	G4	G4(MP2)-6X	G4(MP2)	G3X(MP2)-RAD	CBS-QB3	DSD-PBE-P86	DuT-D3	B2K-PLYP	PWP-B95-D3	M06-2X	ωB97X	PW6-B95	M06-L	MN12-L
Ala	386.047	381.227	384.963	379.356	389.305	385.031	377.534	379.463	374.33	371.434	373.633	367.85	359.581	350.374	365.272
Asn	381.383	374.038	379.531	369.785	385.946	380.665	373.4	374.639	369.257	367.757	371.249	364.278	355.065	348.58	365.74
Asp	374.998	367.757	373.104	363.23	379.61	374.576	366.838	368.465	363.329	361.737	363.489	357.188	349.278	340.56	356.465
Cys	383.743	377.998	382.45	375.082	387.502	382.471	375.928	377.438	372.331	369.797	370.677	366.979	356.804	347.148	362.632
Gly	393.878	389.146	392.146	388.027	396.113	392.9	385.75	387.644	382.936	381.806	383.247	378.601	371.972	366.289	381.01
Pro	376.229	368.648	373.247	365.056	378.627	373.925	367.706	368.586	363.399	362.141	364.003	358.403	349.433	340.026	357.272
Ser	391.198	384.805	389.484	382.173	394.679	389.897	382.948	384.452	379.13	377.193	380.057	373.985	365.312	357.67	374.224
Thr	390.029	381.913	387.327	378.494	393.266	388.379	381.729	383.181	377.89	376.433	378.788	372.689	364.618	358.039	374.868
Val	390.197	382.87	388.096	379.39	393.797	388.837	382.081	383.482	378.444	376.145	378.011	372.371	363.639	356.941	371.694
MAD		6.18699	1.79405	8.90849	3.22988	1.30149	7.98204	6.41127	11.539	13.4178	11.5033	16.798	25.1683	32.7194	17.0801
MD		-6.18699	-1.79405	-8.90849	3.22988	-1.30149	-7.98204	-6.41127	-11.539	-13.4178	-11.5033	-16.798	-25.1683	-32.7194	-17.0801
SD		1.29146	0.600706	2.43654	0.964447	0.490962	0.450184	0.645137	0.76442	1.00355	0.877538	1.22729	2.10299	3.37625	3.10189
LD		-8.11624	-2.98164	-11.7683	4.61159	-2.30387	-8.5226	-7.64314	-12.83	-14.6123	-13.066	-18.197	-26.9397	-36.5957	-21.1118
BDEs quoted as 298 K enthalpies in kJ/mol

## Sheet: Peptide BDE
	DSD-PBE-P86	G4(MP2)-6X	B2K-PLYP	DuT-D3	M06-2X	ωB97X	MN12-L
Ala	354.182	356.988	352.325	357.376	351.579	347.772	338.174
Arg	344.897	343.127	342.643	347.629	342.555	339.572	331.193
Asn	374.95	375.2	372.914	378.172	375.038	369.371	362.33
Asp	367.484	366.893	365.978	370.967	365.746	361.837	355.7
Cys	355.26	355.88	353.233	357.735	350.973	349.545	339.54
Gln	354.697	354.237	352.61	357.649	352.982	349.885	343.467
Glu	382.221	382.06	380.35	385.972	381.984	376.227	372.701
Gly	349.289	351.044	347.467	352.143	348.939	345.8	341.424
His	384.421	383.49	382.011	387.583	383.916	377.399	373.078
Ile	378.776	378.747	376.558	382.279	378.614	372.297	369.162
Leu	376.375	376.622	374.784	380.228	375.255	370.835	364.478
Lys	380.136	379.511	377.9	383.66	380.1	374.161	370.634
Met	382.115	382.02	380.227	385.774	381.481	376.008	373.405
Phe	360.341		358.427	363.471	358.415	354.04	345.801
Pro	381.921	382.649	379.261	384.934	381.852	374.918	370.975
Ser	392.334	393.815	390.259	395.778	393.423	386.454	383.983
Thr	366.677	368.747	364.673	369.782	366.187	360.573	354.093
Trp	364.305		362.494	367.657	364.179	359.227	354.629
Tyr	360.218		358.336	363.295	358.366	354.108	345.875
Val	381.163	381.918	378.9	384.709	381.328	374.917	372.195
MAD		0.956021	1.95277	3.34385	1.10845	5.7187	10.963
MD		0.485493	-1.95187	3.34385	-0.781671	-5.7187	-10.963
SD		1.19906	0.529845	0.462265	1.40158	0.803825	2.55915
LD		2.80674	-2.66016	4.58523	-4.28631	-7.02156	-16.0076
BDEs quoted as 298 K enthalpies in kJ/mol
